# Supplementary material for: Zn–Al Layered Double Hydroxides Synthesized on Aluminum Foams for Fluoride Removal from Water
Source: MDPI journal article supplement (doi:10.3390/pr9122109), 2021-11-24
Supplement: s1 [file s1]

Archive with 1 entries (1 files):
- processes-1450192-supplementary.pdf
