# Supplementary material for: Zn–Al Layered Double Hydroxides Synthesized on Aluminum Foams for Fluoride Removal from Water
Source: MDPI journal article supplement (doi:10.3390/pr9122109), 2021-11-24
Supplement: s1 [file s1 › processes-1450192-supplementary.pdf]

## Supplementary Materials

### Zn-Al layered double hydroxides synthesized on aluminum foams for fluoride removal from water

Yuliu Li<sup>1</sup>, Riccardo Narducci<sup>1,2</sup>, Alessandra Varone<sup>1</sup>, Saulius Kaciulis<sup>3</sup>, Eleonora Bolli<sup>3</sup> and Roberto Pizzoferrato<sup>1,\*</sup>

<sup>1</sup>Department of Industrial Engineering, University of Rome Tor Vergata, Via del Politecnico 1, 00133 Rome, Italy

<sup>2</sup>International Laboratory “Ionomer Materials for Energy”, I-00133 Rome/Marseille, Italy/France

<sup>3</sup>Institute for the Study of Nanostructured Materials, ISMN-CNR, 00015 Monterotondo Stazione, Roma, Italy

\*Correspondence: [pizzoferrato@uniroma2.it](mailto:pizzoferrato@uniroma2.it)

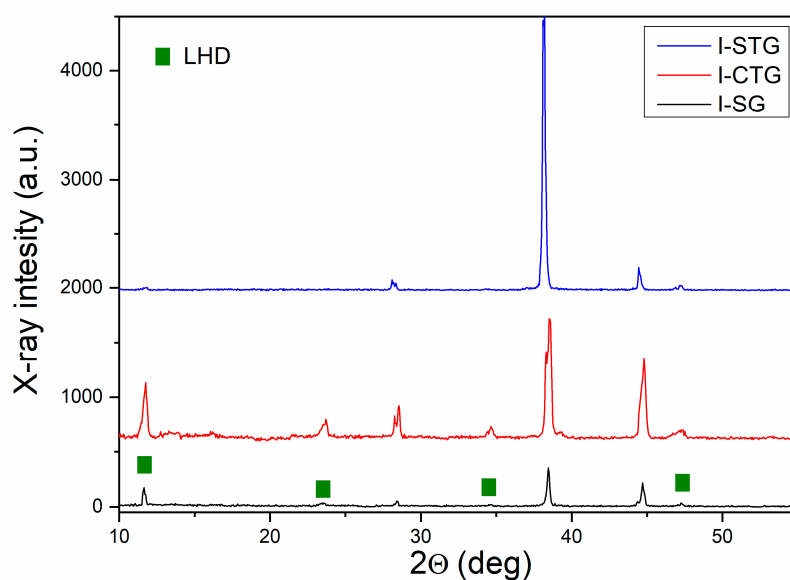

**Figure S1.** XRD spectra of I-SG, I-CTG and I-STG samples.

**Table S1.** Comparison of the relative experimental XRD diffraction intensities with those of Al-Zn LDH powder with random oriented grains.

| $\{hkl\}$ | Random | I-SG | I-CTG | I-STG |
|-----------|--------|------|-------|-------|
| 003       | 100    | 100  | 100   | 56    |
| 006       | 44     | 20   | 36    | 33    |
| 012       | 42     | 12   | 24    | 76    |
| 108       | 30     | 20   | 19    | 100   |

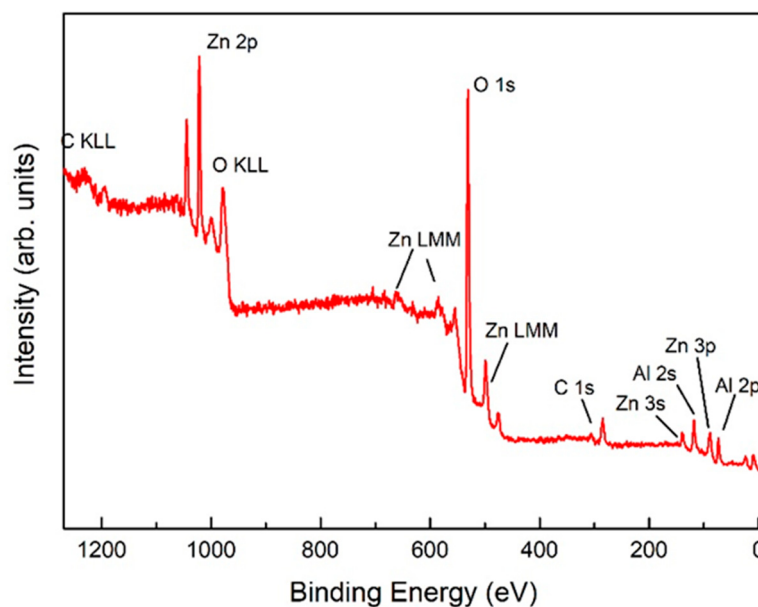

**Figure S2.** XPS survey spectrum of the II-STG sample after regeneration.

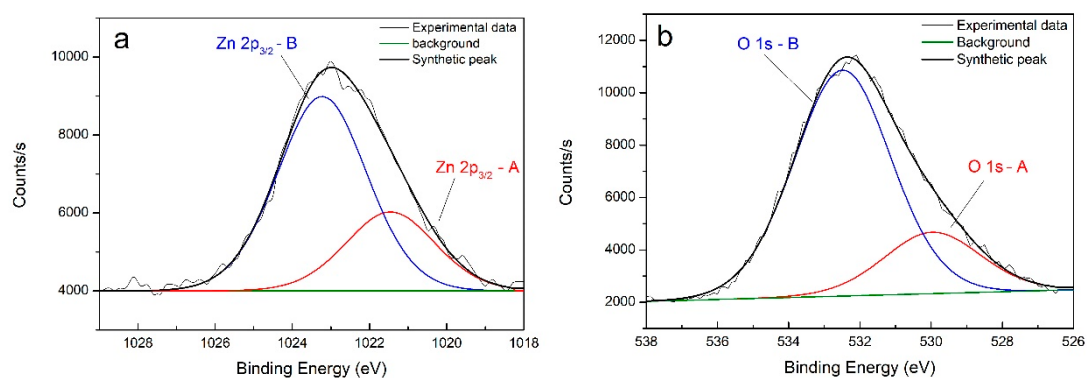

**Figure S3.** XPS spectra of Zn 2p (a) and O 1s (b) regions of the sample II-STG after regeneration.
